# Supplementary material for: Analysis of PI3K/mTOR Pathway Biomarkers and Their Prognostic Value in Women with Hormone Receptor–Positive, HER2-Negative Early Breast Cancer
Source: PubMed Central journal article supplement — Transl Oncol. 2016 Apr 12;9(2):114–23. doi: 10.1016/j.tranon.2016.01.001 (PMC4833894; doi:10.1016/j.tranon.2016.01.001), 2016-04-12
Supplement: mmc1.pdf [file mmc1.pdf]

Table S1: Clinicopathological characteristics in the final patient cohort (58 patients)

| <b>Characteristic</b>              |                      | <b>Number</b> | <b>percent</b> |
|------------------------------------|----------------------|---------------|----------------|
| <b>Age group</b>                   | <i>≤ 50 years</i>    | 27            | 46.6%          |
|                                    | <i>&gt;50 years</i>  | 31            | 53.4%          |
| <b>Histopathology</b>              | <i>IDC</i>           | 43            | 74.1%          |
|                                    | <i>ILC</i>           | 7             | 12.1%          |
|                                    | <i>Mixed</i>         | 4             | 6.9%           |
|                                    | <i>Others</i>        | 4             | 6.9%           |
| <b>Tumor size</b>                  | <i>≤2cm</i>          | 11            | 20.8%          |
|                                    | <i>&gt;2cm</i>       | 42            | 79.2%          |
|                                    | <i>Missing</i>       | 5             |                |
| <b>T stage</b>                     | <i>1</i>             | 11            | 20.8%          |
|                                    | <i>2</i>             | 32            | 60.4%          |
|                                    | <i>3</i>             | 8             | 15.1%          |
|                                    | <i>4</i>             | 2             | 3.8%           |
|                                    | <i>Missing</i>       | 5             |                |
| <b>N stage</b>                     | <i>0</i>             | 24            | 42.1%          |
|                                    | <i>1</i>             | 13            | 22.8%          |
|                                    | <i>2</i>             | 12            | 21.1%          |
|                                    | <i>3</i>             | 8             | 14.0%          |
|                                    | <i>Missing</i>       | 1             |                |
| <b>SBR grade</b>                   | <i>I</i>             | 7             | 12.3%          |
|                                    | <i>II</i>            | 41            | 50.9%          |
|                                    | <i>III</i>           | 21            | 36.8%          |
|                                    | <i>Missing</i>       | 1             |                |
| <b>Type of surgery</b>             | <i>BCS</i>           | 23            | 39.7%          |
|                                    | <i>MRM</i>           | 35            | 60.3%          |
| <b>ER score</b>                    | <i>0</i>             | 6             | 10.5%          |
|                                    | <i>+</i>             | 4             | 7.0%           |
|                                    | <i>++</i>            | 19            | 33.3%          |
|                                    | <i>+++</i>           | 28            | 49.1%          |
|                                    | <i>Missing</i>       | 1             |                |
| <b>PR score</b>                    | <i>0</i>             | 13            | 22.4%          |
|                                    | <i>+</i>             | 7             | 12.1%          |
|                                    | <i>++</i>            | 16            | 27.6%          |
|                                    | <i>+++</i>           | 22            | 37.9%          |
| <b>HER2 status</b>                 | <i>Negative</i>      | 54            | 93.1%          |
|                                    | <i>Positive</i>      | 4             | 6.9%           |
| <b>Adjuvant Hormonal treatment</b> | <i>No</i>            | 1             | 1.7%           |
|                                    | <i>Yes</i>           | 57            | 98.3%          |
| <b>Type of hormonal ttt</b>        | <i>TAM</i>           | 33            | 57.9%          |
|                                    | <i>AI/TAM</i>        | 24            | 42.1%          |
|                                    | <i>None</i>          | 1             |                |
| <b>Adjuvant chemotherapy</b>       | <i>No</i>            | 17            | 29.3%          |
|                                    | <i>Yes</i>           | 41            | 70.7%          |
| <b>Type of chemo</b>               | <i>Anthra</i>        | 15            | 36.6%          |
|                                    | <i>Anthra+Taxane</i> | 23            | 56.1%          |
|                                    | <i>Taxane only</i>   | 3             | 7.3%           |
|                                    | <i>None</i>          | 17            |                |

Table S2: Correlation between Nuclear and cytoplasmic LKB1 expression and the clinicopathologic factors

| Variable                     |                   | Nucl LKB1<br>low<br>No. (%)<br>11 (34.4) | Nucl LKB1<br>high<br>No. (%)<br>21 (65.6) | P*                       | Cyt LKB1<br>low<br>No. (%)<br>12 (37.5) | Cyt LKB1<br>high<br>No. (%)<br>20 (62.5) | P*                 |
|------------------------------|-------------------|------------------------------------------|-------------------------------------------|--------------------------|-----------------------------------------|------------------------------------------|--------------------|
| <b>Age (Yr)</b>              | -Mean ( $\pm$ SD) | 54.2( $\pm$ 12)                          | 49.8 ( $\pm$ 11)                          | <b>0.05</b> <sup>†</sup> | 53.6 ( $\pm$ 13)                        | 49.9 ( $\pm$ 14)                         | 0.37 <sup>†</sup>  |
| <b>Age groups</b>            | - $\leq$ 50y      | 2 (18.2)                                 | 11 (52.4)                                 | <b>0.06</b>              | 3 (25)                                  | 10 (50)                                  | <b>0.16</b>        |
|                              | - >50y            | 9 (81.8)                                 | 10 (47.4)                                 |                          | 9 (75)                                  | 10 (50)                                  |                    |
| <b>Menopausal status</b>     | -Pre              | 2 (18.2)                                 | 11 (52.4)                                 | <b>0.06</b>              | 9 (75)                                  | 10 (50)                                  | <b>0.16</b>        |
|                              | -Post             | 9 (81.8)                                 | 10 (47.6)                                 |                          | 3 (25)                                  | 10 (50)                                  |                    |
| <b>T. size</b>               | - $\leq$ 2cm      | 0 (0)                                    | 6 (33.3)                                  | <b>0.05</b>              | 0 (0)                                   | 6 (35.3)                                 | <b>0.03</b>        |
|                              | - >2cm            | 9 (100)                                  | 12 (66.7)                                 |                          | 10 (100)                                | 11 (64.7)                                |                    |
| <b>N stage</b>               | -0                | 7 (63.6)                                 | 8 (40)                                    | 0.41                     | 6 (50)                                  | 9 (47.4)                                 | 0.98               |
|                              | -1                | 1 (9.1)                                  | 7 (35)                                    |                          | 3 (25)                                  | 5 (26.3)                                 |                    |
|                              | -2                | 2 (18.2)                                 | 4 (20)                                    |                          | 2 (21.1)                                | 4 (21.1)                                 |                    |
|                              | -3                | 1 (9.1)                                  | 1 (5)                                     |                          | 1 (8.3)                                 | 1 (5.3)                                  |                    |
| <b>SBR grade</b>             | -Gr 1             | 2 (18.2)                                 | 0 (0)                                     | <b>0.09</b>              | 2 (16.7)                                | 0 (0)                                    | <b>0.15</b>        |
|                              | -Gr 2             | 4 (36.4)                                 | 13 (61.9)                                 |                          | 5 (41.7)                                | 12 (60)                                  |                    |
|                              | -Gr 3             | 5 (45.5)                                 | 8 (38.1)                                  |                          | 5 (41.7)                                | 8 (40)                                   |                    |
| <b>ER score</b>              | -0                | 4 (36.4)                                 | 1 (4.8)                                   | <b>0.08</b>              | 3 (25)                                  | 2 (10)                                   | 0.41               |
|                              | -1                | 0 (0)                                    | 2 (9.5)                                   |                          | 0 (0)                                   | 2 (10)                                   |                    |
|                              | -2                | 2 (18.2)                                 | 6 (28.6)                                  |                          | 2 (16.7)                                | 6 (30)                                   |                    |
|                              | -3                | 5 (45.5)                                 | 12 (57.1)                                 |                          | 7 (58.3)                                | 10 (50)                                  |                    |
| <b>PR score</b>              | -0                | 7 (63.6)                                 | 3 (14.3)                                  | <b>0.002</b>             | 6 (50)                                  | 4 (20)                                   | 0.36               |
|                              | -1                | 0 (0)                                    | 4 (19)                                    |                          | 1 (8.3)                                 | 3 (15)                                   |                    |
|                              | -2                | 3 (27.3)                                 | 1 (4.8)                                   |                          | 1 (8.3)                                 | 3 (15)                                   |                    |
|                              | -3                | 1 (9.1)                                  | 13 (61.9)                                 |                          | 4 (33.3)                                | 10 (50)                                  |                    |
| <b>Her 2 status</b>          | -Negative         | 8 (72.7)                                 | 20 (95.2)                                 | <b>0.06</b>              | 11 (91.7)                               | 17 (85)                                  | 0.58               |
|                              | -Over-expressed   | 3 (27.3)                                 | 1 (4.8)                                   |                          | 1 (8.3)                                 | 3 (15)                                   |                    |
| <b>Adjuv. Hormonal ttt</b>   | -Tamoxifen        | 5 (50)                                   | 11 (52.4)                                 | 0.90 <sup>††</sup>       | 5 (41.7)                                | 11 (57.9)                                | 0.38 <sup>††</sup> |
|                              | -AI               | 5 (50)                                   | 10 (47.6)                                 |                          | 7 (58.3)                                | 8 (42.1)                                 |                    |
| <b>Adjuvant chemotherapy</b> | -Anthracyclin     | 1 (12.5)                                 | 3 (30)                                    | 0.67                     | 0 (0)                                   | 4 (30.8)                                 | 0.03 <sup>††</sup> |
|                              | -Anthra. + Taxane | 6 (75)                                   | 6 (60)                                    |                          | 3 (60)                                  | 9 (69.2)                                 |                    |
|                              | -Others           | 1 (12.5)                                 | 1 (10)                                    |                          | 2 (40)                                  | 0 (0)                                    |                    |

\*Correlation by Fisher's exact test unless otherwise specified

<sup>†</sup> Difference between means by Student's T test

Table S3: Correlation between Nuclear and cytoplasmic pAKT expression with the clinicopathologic factors

| Variable                     |                   | Nucl. pAKT low<br>No. (%)<br>12 (37.5) | Nucl. pAKT high<br>No. (%)<br>20 (62.5) | P*                | Cyt pAKT low<br>No. (%)<br>10 (31.2) | Cyt pAKT high<br>No. (%)<br>22 (68.8) | P*                |
|------------------------------|-------------------|----------------------------------------|-----------------------------------------|-------------------|--------------------------------------|---------------------------------------|-------------------|
| <b>Age (Yr)</b>              | -Mean ( $\pm$ SD) | 49.4( $\pm$ 15)                        | 58.9( $\pm$ 18)                         | 0.48 <sup>†</sup> | 53.6( $\pm$ 15)                      | 49.3( $\pm$ 14)                       | 0.27 <sup>†</sup> |
| <b>Age groups</b>            | - $\leq$ 50y      | 4 (33.3)                               | 9 (45)                                  | 0.52              | 2 (20)                               | 11 (50)                               | <b>0.11</b>       |
|                              | - >50y            | 8 (66.7)                               | 11 (55)                                 |                   | 8 (80)                               | 11 (50)                               |                   |
| <b>Menopausal status</b>     | -Pre              | 4 (33.3)                               | 9 (45)                                  | 0.52              | 2 (20)                               | 11 (50)                               | <b>0.11</b>       |
|                              | -Post             | 8 (66.7)                               | 11 (55)                                 |                   | 8 (80)                               | 11 (50)                               |                   |
| <b>T. size</b>               | - $\leq$ 2cm      | 2 (18.2)                               | 4 (25)                                  | 0.68              | 1 (11.1)                             | 5 (27.8)                              | 0.33              |
|                              | - >2cm            | 9 (81.8)                               | 12 (75)                                 |                   | 8 (88.9)                             | 13 (72.2)                             |                   |
| <b>N stage</b>               | -0                | 6 (50)                                 | 9 (47.4)                                | 0.78              | 3 (30)                               | 12 (57.1)                             | 0.52              |
|                              | -1                | 2 (16.7)                               | 6 (31.6)                                |                   | 3 (30)                               | 5 (23.8)                              |                   |
|                              | -2                | 3 (25)                                 | 3 (15.8)                                |                   | 3 (30)                               | 3 (14.3)                              |                   |
|                              | -3                | 1 (8.3)                                | 1 (8.3)                                 |                   | 1 (10)                               | 1 (4.8)                               |                   |
| <b>SBR grade</b>             | -Gr 1             | 0 (0)                                  | 2 (10)                                  | 0.43              | 1 (10)                               | 1 (4.5)                               | 0.28              |
|                              | -Gr 2             | 6 (50)                                 | 11 (55)                                 |                   | 7 (70)                               | 10 (45.5)                             |                   |
|                              | -Gr 3             | 6 (50)                                 | 7 (35)                                  |                   | 2 (20)                               | 11 (50)                               |                   |
| <b>ER score</b>              | -0                | 4 (33.3)                               | 1 (5)                                   | <b>0.10</b>       | 2 (20)                               | 3 (13.6)                              | 0.77              |
|                              | -1                | 1 (8.3)                                | 1 (5)                                   |                   | 1 (10)                               | 1 (4.5)                               |                   |
|                              | -2                | 3 (25)                                 | 5 (25)                                  |                   | 3 (30)                               | 5 (22.7)                              |                   |
|                              | -3                | 4 (33.3)                               | 13 (65)                                 |                   | 4 (40)                               | 13 (59.1)                             |                   |
| <b>PR score</b>              | -0                | 6 (50)                                 | 4 (20)                                  | <b>0.15</b>       | 4 (40)                               | 6 (27.3)                              | 0.63              |
|                              | -1                | 0 (0)                                  | 4 (20)                                  |                   | 2 (20)                               | 2 (9.1)                               |                   |
|                              | -2                | 1 (8.3)                                | 3 (15)                                  |                   | 1 (10)                               | 3 (13.6)                              |                   |
|                              | -3                | 5 (41.7)                               | 9 (45)                                  |                   | 3 (30)                               | 11 (50)                               |                   |
| <b>Her 2 status</b>          | -Negative         | 10 (83.3)                              | 18 (90)                                 | 0.58              | 9 (90)                               | 19 (86.4)                             | 0.77              |
|                              | -Over-expressed   | 2 (16.7)                               | 2 (10)                                  |                   | 1 (10)                               | 3 (13.6)                              |                   |
| <b>Adjuv. Hormonal ttt</b>   | -Tamoxifen        | 6 (50)                                 | 10 (52.6)                               | 0.88              | 4 (40)                               | 12 (57.1)                             | 0.37              |
|                              | -AI               | 6 (50)                                 | 9 (47.4)                                |                   | 6 (60)                               | 9 (42.9)                              |                   |
| <b>Adjuvant chemotherapy</b> | -Anthracyclin     | 2 (25)                                 | 2 (20)                                  | 0.95              | 1 (16.7)                             | 3 (25)                                | 0.83              |
|                              | -Anthra. + Taxane | 5 (62.5)                               | 7 (70)                                  |                   | 4 (66.7)                             | 8 (66.7)                              |                   |
|                              | -Others           | 1 (12.5)                               | 1 (10)                                  |                   | 1 (16.7)                             | 1 (8.3)                               |                   |

\*Correlation by Fisher's exact test unless otherwise specified

<sup>†</sup> Difference between means by Student's T test

Table S4: Correlation between pS6RP, p4EBP1 expression with the clinicopathologic factors

| Variable              |                   | pS6RP<br>low<br>No. (%)<br>14 (42.4) | pS6RP high<br>No. (%)<br>19 (57.6) | P*            | P4EBP1<br>low<br>No. (%)<br>19 (57.6) | P4EBP1<br>high<br>No. (%)<br>14 (42.4) | P*            |
|-----------------------|-------------------|--------------------------------------|------------------------------------|---------------|---------------------------------------|----------------------------------------|---------------|
| Age (Yr)              | -Mean ( $\pm$ SD) | 53.6( $\pm$ 15)                      | 46.5( $\pm$ 14)                    | <b>0.08</b> † | 54.6( $\pm$ 12)                       | 47.3( $\pm$ 14)                        | <b>0.07</b> † |
| Age groups            | - $\leq$ 50y      | 3 (21.4)                             | 10 (52.6)                          | <b>0.07</b>   | 4 (21.1)                              | 9 (64.3)                               | <b>0.01</b>   |
|                       | - >50y            | 11 (78.6)                            | 9 (47.4)                           |               | 15 (78.9)                             | 5 (35.7)                               |               |
| Menopausal status     | -Pre              | 3 (21.4)                             | 10 (52.6)                          | <b>0.07</b>   | 4 (21.1)                              | 9 (64.3)                               | <b>0.01</b>   |
|                       | -Post             | 11 (78.6)                            | 9 (47.4)                           |               | 15 (78.9)                             | 5 (35.7)                               |               |
| T. size               | - $\leq$ 2cm      | 2 (15.4)                             | 4 (26.7)                           | 0.47          | 2 (11.8)                              | 4 (36.4)                               | <b>0.12</b>   |
|                       | - >2cm            | 11 (84.6)                            | 11 (73.3)                          |               | 15 (88.2)                             | 7 (63.6)                               |               |
| N stage               | -0                | 6 (42.9)                             | 9 (50)                             | 0.97          | 7 (36.8)                              | 8 (61.5)                               | 0.42          |
|                       | -1                | 4 (28.6)                             | 4 (22.2)                           |               | 5 (26.3)                              | 3 (23.1)                               |               |
|                       | -2                | 3 (21.4)                             | 4 (22.2)                           |               | 5 (26.3)                              | 2 (15.4)                               |               |
|                       | -3                | 1 (7.1)                              | 1 (5.6)                            |               | 2 (10.5)                              | 0 (0)                                  |               |
| SBR grade             | -Gr 1             | 2 (14.3)                             | 0 (0)                              | 0.21          | 0 (0)                                 | 2 (14.3)                               | 0.24          |
|                       | -Gr 2             | 6 (42.9)                             | 11 (57.9)                          |               | 10 (52.6)                             | 7 (50)                                 |               |
|                       | -Gr 3             | 6 (42.9)                             | 8 (42.1)                           |               | 9 (47.4)                              | 5 (35.7)                               |               |
| ER score              | -0                | 4 (28.6)                             | 2 (10.5)                           | <b>0.14</b>   | 5 (26.3)                              | 1 (7.1)                                | 0.57          |
|                       | -1                | 2 (14.3)                             | 0 (0)                              |               | 1 (5.3)                               | 1 (7.1)                                |               |
|                       | -2                | 3 (21.4)                             | 5 (26.3)                           |               | 4 (21.1)                              | 4 (28.6)                               |               |
|                       | -3                | 5 (35.7)                             | 12 (63.2)                          |               | 9 (47.4)                              | 8 (57.1)                               |               |
| PR score              | -0                | 8 (57.1)                             | 3 (15.8)                           | <b>0.06</b>   | 8 (42.1)                              | 3 (21.4)                               | 0.67          |
|                       | -1                | 1 (7.1)                              | 3 (15.8)                           |               | 2 (10.5)                              | 2 (14.3)                               |               |
|                       | -2                | 2 (14.3)                             | 2 (10.5)                           |               | 2 (10.5)                              | 2 (14.3)                               |               |
|                       | -3                | 3 (21.4)                             | 11 (57.9)                          |               | 7 (36.8)                              | 7 (50)                                 |               |
| Her 2 status          | -Negative         | 13 (92.9)                            | 16 (84.2)                          | 0.45          | 17 (89.5)                             | 12 (85.7)                              | 0.74          |
|                       | -Over-expressed   | 1 (7.1)                              | 3 (15.8)                           |               | 2 (10.5)                              | 2 (14.3)                               |               |
| Adjuv. Hormonal ttt   | -Tamoxifen        | 7 (50)                               | 10 (55.6)                          | 0.76          | 8 (42.1)                              | 9 (69.2)                               | 0.13          |
|                       | -AI               | 7 (50)                               | 8 (44.4)                           |               | 11 (57.9)                             | 4 (30.8)                               |               |
| Adjuvant chemotherapy | -Anthracyclin     | 1 (10)                               | 3 (33.3)                           | 0.22          | 2 (15.4)                              | 2 (33.3)                               | 0.46          |
|                       | -Anthra. + Taxane | 7 (70)                               | 6 (66.7)                           |               | 9 (69.2)                              | 4 (66.7)                               |               |
|                       | -Others           | 2 (20)                               | 0 (0)                              |               | 2 (15.4)                              | 0 (0)                                  |               |

\*Correlation by Fisher's exact test unless otherwise specified

† Difference between means by Student's T test
